# Supplementary material for: A novel thiol-saccharide mucolytic for the treatment of muco-obstructive lung diseases
Source: PubMed Central journal article supplement (PMC10209473; doi:10.1183/13993003.02022-2022), 2023-05-25

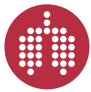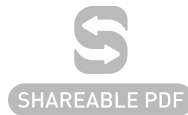

# A novel thiol-saccharide mucolytic for the treatment of muco-obstructive lung diseases

Annalisa Addante<sup>1,2</sup>, Wilfred Raymond<sup>3</sup>, Irina Gitlin<sup>3</sup>, Annabelle Charbit<sup>3</sup>, Xavier Orain<sup>3</sup>, Aaron Wolfe Scheffler<sup>4</sup>, Aditi Kuppe<sup>1,2</sup>, Julia Duerr <sup>1,2</sup>, Maria Daniltchenko<sup>1</sup>, Marika Drescher<sup>1</sup>, Simon Y. Graeber <sup>1,2,5</sup>, Anne-Marie Healy<sup>6</sup>, Stefan Oscarson <sup>7</sup>, John V. Fahy<sup>3,8,9</sup> and Marcus A. Mall <sup>1,2,5,9</sup>

<sup>1</sup>Department of Pediatric Respiratory Medicine, Immunology and Critical Care Medicine, Charité – Universitätsmedizin Berlin, corporate member of Freie Universität Berlin and Humboldt-Universität zu Berlin, Berlin, Germany. <sup>2</sup>German Centre for Lung Research (DZL), associated partner, Berlin, Germany. <sup>3</sup>Cardiovascular Research Institute, University of California San Francisco, San Francisco, CA, USA. <sup>4</sup>Department of Epidemiology and Biostatistics, University of California San Francisco, San Francisco, CA, USA. <sup>5</sup>Berlin Institute of Health (BIH) at Charité – Universitätsmedizin Berlin, Berlin, Germany. <sup>6</sup>School of Pharmacy and Pharmaceutical Sciences, Trinity College Dublin, Dublin, Ireland. <sup>7</sup>Centre for Synthesis and Chemical Biology, University College Dublin, Belfield, Ireland. <sup>8</sup>Division of Pulmonary and Critical Care Medicine, University of California San Francisco, San Francisco, CA, USA. <sup>9</sup>J.V. Fahy and M.A. Mall contributed equally as senior authors.

Corresponding author: Marcus A. Mall ([marcus.mall@charite.de](mailto:marcus.mall@charite.de))

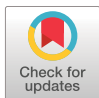

Shareable abstract (@ERSpublications)

**MUC-031, a novel thiol-saccharide mucolytic drug, is potent and fast acting in rheology-based sputum assays and improves mucus obstruction, airway inflammation and survival in a mouse model of muco-obstructive lung disease** <http://bit.ly/3Z2UIVQ>

**Cite this article as:** Addante A, Raymond W, Gitlin I, *et al.* A novel thiol-saccharide mucolytic for the treatment of muco-obstructive lung diseases. *Eur Respir J* 2023; 61: 2202022 [DOI: 10.1183/13993003.02022-2022].

This single-page version can be shared freely online.

Copyright ©The authors 2023.

This version is distributed under the terms of the Creative Commons Attribution Licence 4.0.

This article has an editorial commentary:  
<https://doi.org/10.1183/13993003.00619-2023>

Received: 19 Oct 2022  
Accepted: 13 March 2023

## Abstract

**Background** Mucin disulfide cross-links mediate pathologic mucus formation in muco-obstructive lung diseases. MUC-031, a novel thiol-modified carbohydrate compound, cleaves disulfides to cause mucolysis. The aim of this study was to determine the mucolytic and therapeutic effects of MUC-031 in sputum from patients with cystic fibrosis (CF) and mice with muco-obstructive lung disease ( $\beta$ ENaC-Tg mice).

**Methods** We compared the mucolytic efficacy of MUC-031 and existing mucolytics (N-acetylcysteine (NAC) and recombinant human deoxyribonuclease I (rhDNase)) using rheology to measure the elastic modulus ( $G'$ ) of CF sputum, and we tested effects of MUC-031 on airway mucus plugging, inflammation and survival in  $\beta$ ENaC-Tg mice to determine its mucolytic efficacy *in vivo*.

**Results** In CF sputum, compared to the effects of rhDNase and NAC, MUC-031 caused a larger decrease in sputum  $G'$ , was faster in decreasing sputum  $G'$  by 50% and caused mucolysis of a larger proportion of sputum samples within 15 min of drug addition. Compared to vehicle control, three treatments with MUC-031 in 1 day in adult  $\beta$ ENaC-Tg mice decreased airway mucus content ( $16.8 \pm 3.2$  versus  $7.5 \pm 1.2$  nL·mm<sup>-2</sup>,  $p < 0.01$ ) and bronchoalveolar lavage cells ( $73\,833 \pm 6930$  versus  $47\,679 \pm 7736$  cells·mL<sup>-1</sup>,  $p < 0.05$ ). Twice-daily treatment with MUC-031 for 2 weeks also caused decreases in these outcomes in adult and neonatal  $\beta$ ENaC-Tg mice and reduced mortality from 37% in vehicle-treated  $\beta$ ENaC-Tg neonates to 21% in those treated with MUC-031 ( $p < 0.05$ ).

**Conclusion** MUC-031 is a potent and fast-acting mucolytic that decreases airway mucus plugging, lessens airway inflammation and improves survival in  $\beta$ ENaC-Tg mice. These data provide rationale for human trials of MUC-031 in muco-obstructive lung diseases.

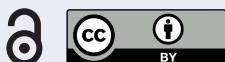

Supplement: ERJ-02022-2022.Shareable.pdf [file ERJ-02022-2022.Shareable.pdf]
